# Supplementary material for: Radical addition of nitrones to acrylates mediated by SmI2: asymmetric synthesis of γ-amino acids employing carbohydrate-based chiral auxiliaries
Source: Royal Society of Chemistry journal article supplement (doi:10.1039/b405141f), 2004-01-01
Supplement: b405141f.doc [file b405141f.doc]

Radical addition of nitrones to acrylates mediated by SmI2: asymmetric synthesis of γ-amino acids employing carbohydrate-based chiral auxiliaries.

**Sine A. Johannesen, Silvia Albu, Rita G. Hazell and Troels Skrydstrup***

# Department of Chemistry, University of Aarhus, Langelandsgade 140, 8000 Aarhus C, Denmark

## Supporting Information

**General methods.**

The 1H NMR and 13C NMR were recorded at 400 MHz and 100 MHz, respectively. The chemical shifts are reported in ppm downfield to TMS ( = 0) for 1H NMR and relative to the central CDCl3 resonance ( = 77.16) for 13C NMR. Solvents were dried according to standard procedures. The diastereomeric ratio was determined by the 1H NMR or 13C NMR spectrum of the crude product.

**General procedure for the addition of nitrones to acrylates.**

The nitrone (0.5 mmol) and the acrylate (0.5 mmol) were placed in a round bottomed flask fitted with a magnetic stirring bar where after the flask was flushed with Argon. Dry THF (10 mL) and *t*-BuOH (1.0 mmol) were added and the solution was cooled to –78oC. SmI2 (12 mL, 0.1M in THF) was added dropwise and the solution was left stirring approx. 20h. The reaction was quenched with sat. NH4Cl (2 ml) at –78o and warmed to room temperature. 30 ml of water was added and the mixture was extracted three times with CH2Cl2 (3x100 ml). The organic phase was washed with brine, dried with MgSO4 and evaporated *in vacuo*. The compounds were purified by flash chromatography using pentane:EtOAc as the eluent.

**General procedure for the hydroysis of the adducts.**

Trifluoroacetic acid (99%, 1 mL) was added to a mixture of water (2 mL) and the adduct (0.38 mmol) in CH2Cl2 (4 mL). The two phase mixture was stirred vigorously for approx. 2 h. 20 mL of water was added and the mixture was extracted two times with DCM (2x50 mL). The organic phase was washed with sat. NaCl, dried with MgSO4 and evaporated *in vacuo*. The compounds were purified by flash chromatography using pentane:EtOAc as the eluent. Analysis of the compounds was done instantly due to the instability of the products.

# **(R)-N-(3-Buthoxycarbonyl-1-cyclohexylpropyl)-2,3:5,6-bis-O-isopropylidene-D-mannose-imine N-oxide (2a).**

1H NMR (400 MHz, CDCl3)  (ppm) 6.96 (d, 1H, *J =* 5.1 Hz), 5.44 (dd, 1H, *J =* 5.1, 7.8 Hz), 4.79 (dd, 1H, *J =* 0.7, 7.8 Hz), 4.09-4.02 (m, 1H), 4.07 (t, 2H, *J =* 6.7 Hz), 3.98-3.92 (m, 2H), 3.58-3.50 (m, 1H), 2.95-2.88 (m, 1H), 2.45-2.34 (m, 1H), 2.27-2.12 (m, 2H), 2.07-1.96 (m, 2H), 1.86-1.56 (m, 7H), 1.51 (s, 3H), 1.41 (s, 3H), 1.40 (s, 3H), 1.40-1.00 (m, 8H), 1.33 (s, 3H), 0.93 (t, 3H, *J =* 7.4 Hz).

13C NMR (100 MHz, CDCl3)  (ppm) 173.1, 138.7, 109.7, 109.4, 79.5, 76.8, 76.2, 72.9, 70.6, 67.2, 64.6, 40.0, 30.8, 30.5, 29.8, 29.4, 27.1, 26.4, 26.3, 26.1, 25.8, 25.6, 24.6, 24.0, 19.3, 13.8.

IR (cm-1) 3230, 2988, 2923, 2852, 1727, 1617, 1448, 1382, 1215.

HRMS C26H45NO8 [M+Na+]; calculated: 522.3043 found: 522.3044.

# **(S)-N-(3-Buthoxycarbonyl-1-cyclohexylpropyl)-2,3:5,6-bis-O-isopropylidene-D-mannose-imine N-oxide (6).**

1H NMR (400 MHz, CDCl3)  (ppm) 6.95 (d, 1H, *J =* 4.7 Hz), 5.40 (dd, 1H, *J =* 4.7, 7.8 Hz), 4.81 (d, 1H, *J =* 7. 8 Hz), 4.16-3.91 (m, 5H), 3.53-3.41 (m, 2H), 2.52-2.26 (m, 3H), 2.25-2.14 (m, 1H), 2.08-2.97 (m, 1H), 1.89-1.55 (m, 9H), 1.51 (s, 3H), 1.47-1.05 (m, 4H), 1.42 (s, 3H), 1.40 (s, 3H), 1.34 (s, 3H), 1.03-0.82 (m, 2H) 0.91 (t, 3H, *J =* 7.3 Hz).

13C NMR (100 MHz, CDCl3)  (ppm) 173.5, 139.5, 109.6h, 109.5, 79.2, 77.4, 76.3, 72.9, 70.4, 67.0, 64.6, 39.4, 30.8, 30.4, 29.9, 29.7, 27.1, 26.4, 26.2, 26.0, 25.8, 25.6, 24.8, 24.2, 19.2, 13.9.

HRMS C26H45NO8 [M+Na+]; calculated: 522.3043 found: 522.3044.

# **(R)-N-(3-Buthoxycarbonyl-1-isopropylpropyl)-2,3:5,6-bis-O-isopropylidene-D-mannose-imine N-oxide (2b).**

1H NMR (400 MHz, CDCl3)  (ppm) 6.96 (d, 1H, *J =* 5.0 Hz), 5.42 (dd, 1H, *J =* 5.0, 7.8 Hz), 4.79 (d, 2H, *J =* 7.8 Hz), 4.10-4.01 (m, 1H), 4.07 (t, 1H, *J =* 6.7 Hz), 3.99-3.93 (m, 2H), 3.52-3.42 (m, 2H), 2.45-2.34 (m, 1H), 2.28-1.96 (m, 5H), 1.68-1.58 (m, 2H), 1.54 (s, 3H), 1.44-1.32 (m, 2H), 1.42 (s, 3H), 1.41 (s, 3H), 1.34 (s, 3H), 1.01 (d, 3H, *J =* 6.8 Hz), 1.00 (d, 3H, *J =* 6.5 Hz), 0.93 (t, 3H, *J =* 7,3 Hz).

13C NMR (100 MHz, CDCl3)  (ppm) 173.1, 138.7, 109.7, 109.5. 80.4, 76.9, 76.3, 72.9, 70.5, 67.1, 64.6, 30.9, 30.8, 30.6, 27.1, 26.5, 25.6, 25.0, 24.0, 19.7, 19.3 (2C), 13.9.

IR (cm-1) 3343, 2962, 2935, 1721, 1613, 1455, 1371.

HRMS C23H41NO8 [M+Na+]; calculated: 482.2730 found: 482.2732.

**(*R*)-*N*-(3-Buthoxycarbonyl-1-cyclopentylpropyl)-2,3:5,6-bis-*O*-isopropylidene-D-mannose-imine *N*-oxide (2c).**

1H NMR (400 MHz, CDCl3) δ (ppm) 6.96 (d, 1H, *J =* 5.5 Hz), 5.42 (dd, 1H, *J =* 5.5, 7.8 Hz), 4.81 (d, 1H, *J =* 7.8 Hz), 4.08-4.01 (m, 2H), 4.06-4.05 (t, 1H, *J =* 6.4 Hz), 3.97-3.93 (m, 2H), 3.57-3.52 (m, 1H), 3.41-3.38 (m, 1H), 2.40-2.34 (m, 2H), 2.28-2.14 (m, 2H), 2.02-1.94 (m, 2H), 1.82-1.78 (m, 2H), 1.61-1.53 (m, 4H), 1.51-1.21 (m, 6H), 1.51 (s, 3H), 1.42 (s, 3H), 1.40 (s, 3H), 1.33 (s, 3H), 0.94 (t, 3H, *J =* 7.2 Hz).

13C NMR (50 MHz, CDCl3) δ (ppm) 173.15, 138.54, 109.72, 109.4, 79.6, 76.9, 76.3, 73.0, 70.3, 67.1, 64.6, 42.5, 30.8, 30.5, 30.0, 29.6, 27.1, 26.5, 26.4, 25.8, 25.6, 25.3, 24.0, 19.3, 13.9.

IR 3265, 2987, 2957, 2874, 1748, 1726, 1616, 1458, 1381, 1215 cm-1.

HRMS C25H43NO8 [M+Na+]; calculated: 508.2886 found: 508.2881.

**(*R*)-*N*-(3-Buthoxycarbonyl-1-(1-ethylpropyl)propyl)-2,3:5,6-bis-*O*-isopropylidene-D-mannose-imine *N*-oxide (2d).**

1H NMR (400 MHz, CDCl3) δ (ppm) 6.96 (d, 1H, *J =* 5.5 Hz), 5.43 (dd, 1H, *J =*5.5, 7.8 Hz), 4.81 (d, 1H, *J =* 7.8 Hz), 4.08-4.02 (m, 2H), 4.07 (t, 1H, *J =* 6.4 Hz), 3.97-3.92 (m, 2H), 3.76-3.71 (m, 1H), 3.42-3.37 (m, 1H) 2.44-2.37 (m, 1H) 2.27-2.11 (m, 2H), 2.02-1.95 (m, 2H), 1.81-1.80 (m, 1H), 1.66-1.33 (m, 8H), 1.50 (s, 3H), 1.41 (s, 3H), 1.40 (s, 3H), 1.33 (s, 3H), 0.94 (m, 9H).

13C NMR (50 MHz, CDCl3) δ (ppm) 173.2, 138.8, 109.7, 109.4, 76.9, 76.4, 76.3, 72.9, 70.59, 67.1, 64.6, 42.5, 30.8, 30.6, 27.2, 26.5, 25.6, 24.6, 24.0, 21.4, 20.6, 19.3, 13.9, 10.9, 10.1.

IR 3259, 2933, 2967, 2877, 1728, 1458, 1384, 1370, 1217 cm-1.

HRMS C25H45NO8 [M+Na+]; calculated: 510.3042 found: 510.3043.

# **(S)-N-(3-Buthoxycarbonyl-1-cyclohexylpropyl)-2,3-O-isopropylidene-5-deoxy-D-ribose-imine N-oxide (4a).**

1H NMR (400 MHz, CDCl3)  (ppm) 6.75 (d, 1H, *J =* 5.5 Hz), 5.30 (dd, 1H, *J =* 5.5, 5.7 Hz), 4.10 (dd, 1H, *J =* 5.7, 8.9 Hz), 4.07 (t, 2H, *J =* 6.7 Hz), 3.69-3.55 (m, 2H), 2.41-2.32 (m, 1H), 2.25-2.00 (m, 3H), 1.88-1.56 (m, 9H), 1.47 (s, 3H), 1.40 (s, 3H), 1.41-1.22 (m, 4H), 1.27 (d, 3H, *J =* 5.8 Hz), 1.20-1.11 (m, 1H), 1.06-0.94 (m, 2H), 0.93 (t, 3H, *J =* 7.3 Hz).

13C NMR (100 MHz, CDCl3)  (ppm) 172.8, 143.0, 110.0, 84.7, 79.6, 74.8, 67.2, 64.5, 39.4, 30.6, 30.1, 29.5, 29.4, 27.6, 26.1, 25.8, 25.6, 25.3, 24.5, 20.4, 19.1, 13.7.

IR (cm-1) 3335 ,2930, 2850, 1730, 1587, 1453, 1382, 1304.

HRMS C22H39NO6 [M+Na+]; calculated: 436.2675 found: 436.2678.

# **(S)-N-(3-Buthoxycarbonyl-1-isopropylpropyl)-2,3-O-isopropylidene-5-deoxy-D-ribose-imine N-oxide (4b).**

1H NMR (400 MHz, CDCl3)  (ppm) 6,79 (d, 1H, *J =* 5.0 Hz), 5.34-5.27 (m, 1H), 4.14-4.05 (m, 1H), 4.07 (t, 2H, *J =* 6.7 Hz), 3.70-3.60 (m, 1H), 3.56-3.48 (m, 1H), 2.42-2.33 (m, 1H), 2.26-2.00 (m, 4H), 1.65-1.57 (m, 2H), 1,47 (s,3H), 1.42-1.32 (m, 3H), 1.41 (s, 3H), 1.27 (d, 3H, *J =* 5.8 Hz), 1.02 (d, 6H, *J =* 6.6 Hz), 0.93 (t, 3H, *J =* 7.2 Hz).

13C NMR (100 MHz, CDCl3)  (ppm) 171.8, 142.1, 109.0, 83.7, 79.4, 73.7, 66.3, 63.5, 29.6 (2C), 29.2, 26.6, 24.3, 23.8, 19.4, 18.6, 18.1(2C), 12.7.

IR (cm-1) 3250, 1965, 2936, 2876, 1733, 1589, 1457, 1382, 1302.

HRMS C19H35NO6 [M+Na+]; calculated: 396.2362 found: 396.2356.

# **(S)-N-(3-Buthoxycarbonyl-1-cyclopentylpropyl)-2,3-O-isopropylidene-5-deoxy-D-ribose-imine N-oxide (4c).**

1H NMR (400 MHz, CDCl3)  (ppm) 6.8 (d, 1H, *J =* 5.6 Hz), 5.31 (dd, 1H, *J =* 5.6, 6.0 Hz) 5.27 (bs, 1H), 4.11 (dd, 1H, *J =* 6.0, 9.2 Hz), 4.07 (t, 1H, *J =* 6.4 Hz), 3.67-3.55 (m, 2H), 2.42-2.31 (m, 2H), 2.25-2.13 (m, 2H), 2.05-1.81 (m, 3H), 1.71-1.56 (m, 5H), 1.47 (s, 3H), 1.42-1.31 (m, 3H), 1.40 (s, 3H), 1.27 (d, 3H, *J =* 6.0 Hz), 1.26-1.14 (m, 3H), 0.93 (t, 3H, *J =* 7.4 Hz)

13C NMR (100 MHz, CDCl3)  (ppm) 172.9, 142.7, 110.1, 85.0, 79.9, 74.8, 67.3, 64.7, 42.4, 30.7, 30.2 (2C), 29.8, 27.7, 26.3, 25.6, 25.5, 25.2, 20.6, 19.3, 13.8.

IR (cm-1) 3244, 2960, 2873, 1732, 1590, 1452, 1382, 1309.

HRMS C21H37NO6 [M+Na+]; calculated: 422.2518 found: 422.2517.

**4-*N*-Hydroxy-amino-4-cyclohexylbutyric acid butyl ester (5).**

1H NMR (400 MHz, CDCl3)  (ppm) 5.38 (bs, 1H), 4.09 (t, 2H, *J =* 6.6 Hz) 2.51-2.44 (m, 1H), 2.42-2.36 (m, 2H), 1.93-1.84 (m, 1H), 1.83-1.51 (m, 9H), 1.44-1.34 (m, 2H), 1.32-1.10 (m, 3H), 1.04-0.92 (m, 2H), 0.94 (t, 3H, *J =* 7.4 Hz).

13C NMR (100 MHz, CDCl3)  (ppm) 174.6, 66.7, 65.2, 37.6, 31.5, 30.5, 29.2, 28.3, 26.0 (2C), 25.9, 22.0, 19.1, 13.7.

HRMS C14H27NO3 [M+Na+]; calculated: 280.1888 found: 280.1889.

**4-*N*-Hydroxy-amino-4-isopropylbutyric acid butyl ester.**

1H NMR (400 MHz, CDCl3)  (ppm) 5.43 (bs, 1H), 4.08 (t, 2H, *J =* 6.6 Hz), 2.48-2.33 (m, 3H), 1.96-1.82 (m, 2H), 1.81-1.70 (m, 1H), 1.66-1.57 (m, 2H), 1.45-1.33 (m, 2H), 0.95 (d, 3H, *J =* 6.8 Hz), 0.93 (t, 3H, *J =* 7.4 Hz), 0.92 (d, 3H, *J =* 7.2 Hz).

13C NMR (100 MHz, CDCl3)  (ppm) 174.6, 66.7, 64.5, 31.7, 30.7, 28.6, 23.6, 19.2 (2C) 18.7, 13.8.

HRMS C11H23NO3 [M+Na+]; calculated: 240.1576 found: 240.1498.
